# Supplementary material
Source: PubMed Central journal article supplement (PMC3623249)
Supplement: AEM.03067-12_zam999104265so1.pdf [file AEM.03067-12_zam999104265so1.pdf]

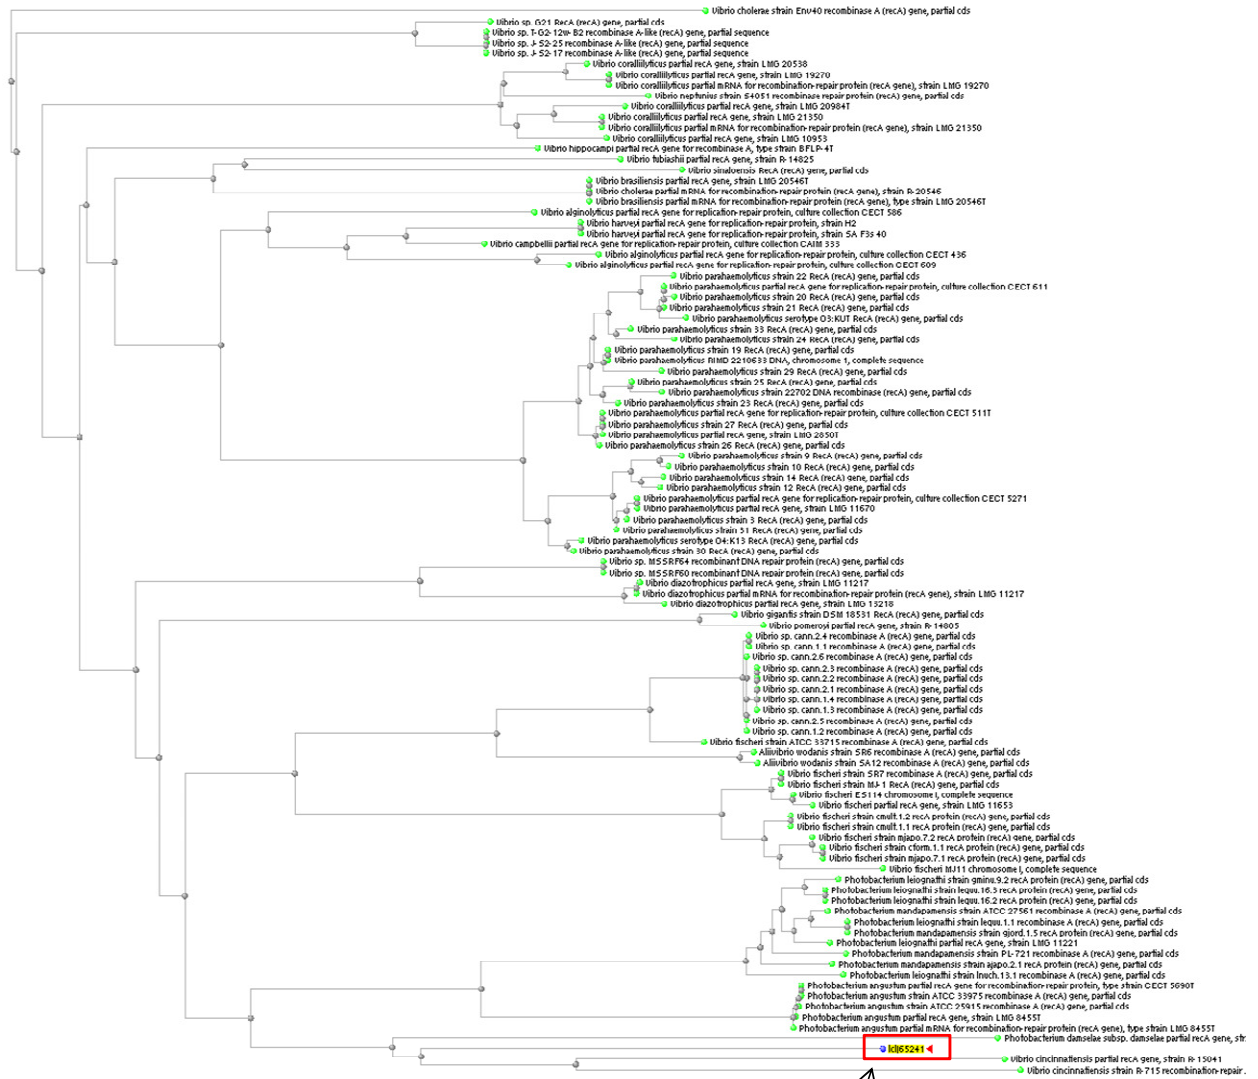

Query ID lcl65241 represents the nucleotide sequence of allele *recA107* and shows that this allele does not share identical *recA* sequence to those of the other *Vibrio* species from NCBI database.

**FIG S1** Neighbour-Joining tree of *recA* nucleotide sequences of sixteen *Vibrios* species and related species such as *Photobacterium* species from NCBI database. Query ID lcl65241 (representing the nucleotide sequence of allele *recA107*) represents a distinct lineage and presumably originates from a previously unidentified species.

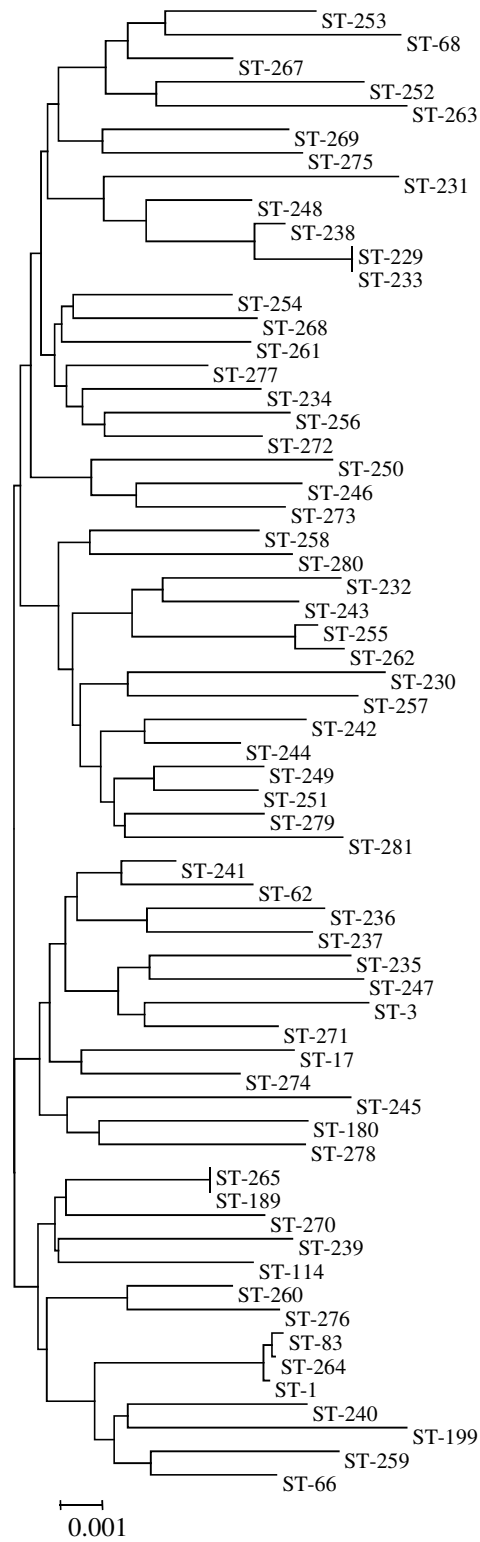

**FIG S2** Neighbour-Joining tree of 63 STs representing the concatenated sequences of six housekeeping genes (with *recA* removed) of 102 *V. parahaemolyticus* isolates from multiple sources in Thailand. The branching pattern of this tree does not consist of the two main lineages A and B (as well as clades I and II) that are clearly differentiated in the phylogenetic tree of the concatenated sequences of all seven housekeeping genes (Fig. 3).



**FIG S3** (A) Distribution of polymorphic nucleotide sites among a sample of *recA* alleles. The numbers written vertically above the sequences represent the positions of polymorphic nucleotide sites. The dots represent sites where the nucleotides match those of the top sequence (*recA60*). The boxes indicate regions of sequence identity that represent proposed recombinant segments. (B) Schematic representation of recombinant fragments A, B and C among *recA* alleles corresponding to the nucleotide sequences shown in Fig. S3A. Different nucleotide sequences in recombinant segments A, B, and C are represented by A1-4, B1-5, and C1-3, respectively. Segments B3 and B3\* differ at only a single nucleotide site. Mosaic designations are represented by different combination of A, B and C. Mosaic alleles have been formed by from one to three separate intragenic recombination events. The figure shows the *recA60*, *recA116*, *recA17*, *recA36*, *recA123*, *recA27*, *recA126*, *recA48*, *recA88*, and *recA19* alleles have complex combinations of the internal segments A, B, and C that are indicative of multiple intragenic recombination events.

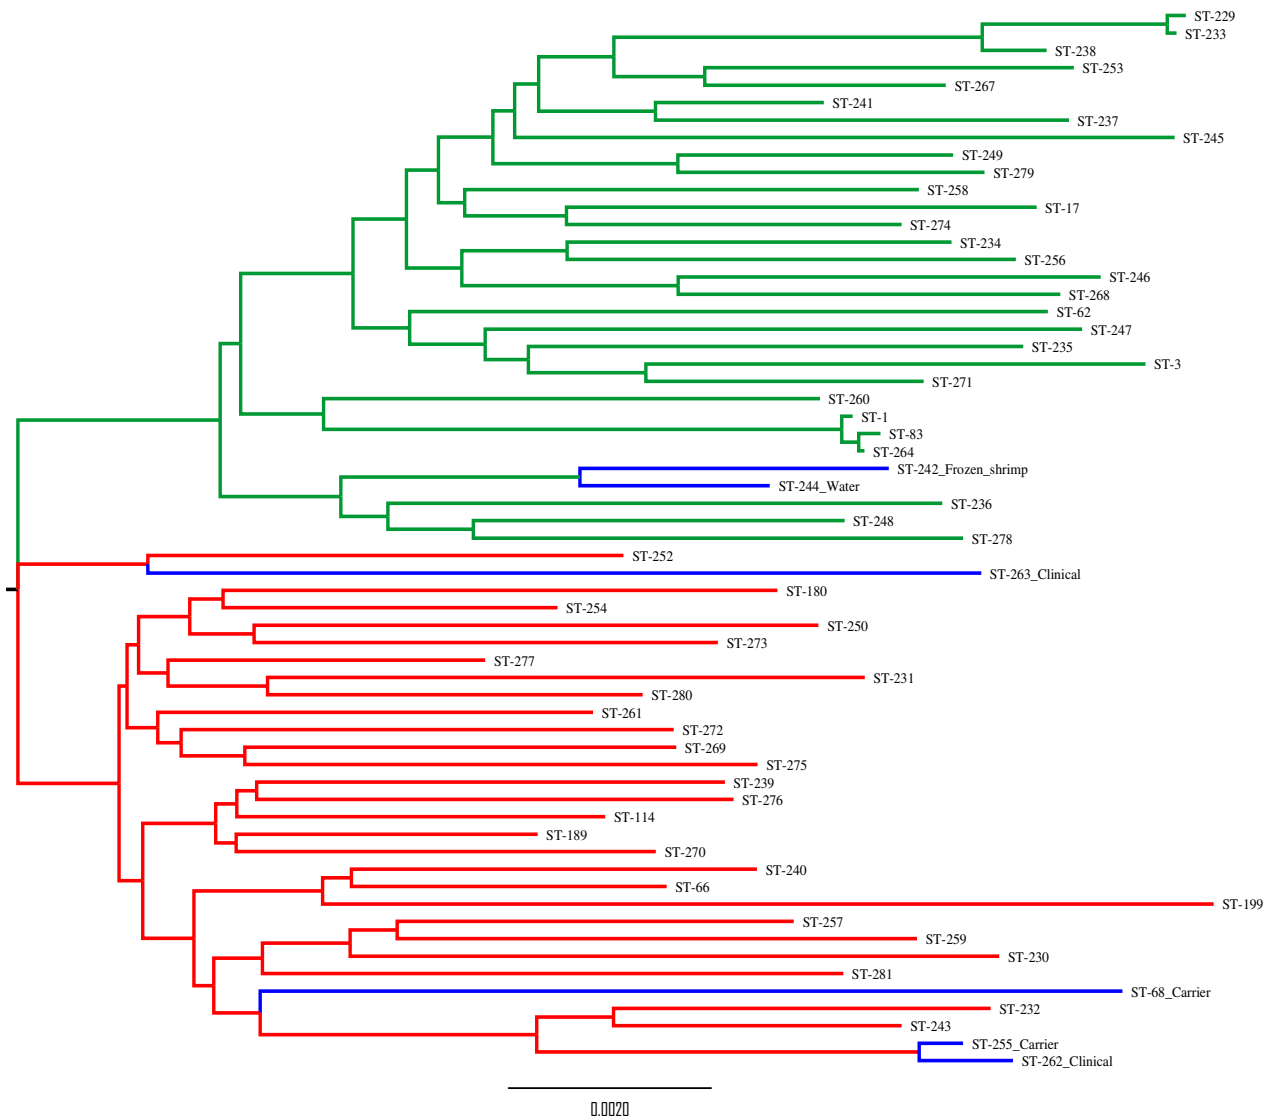

**FIG S4** Neighbour-Joining tree representing BAPS clusters and admixture STs. The lineages representing different STs are coloured according to the BAPS cluster classification. Red and green colours represent STs in distinct population clusters whereas blue represent admixture STs. The population structure was obtained using the admixture model where  $K = 2$ .



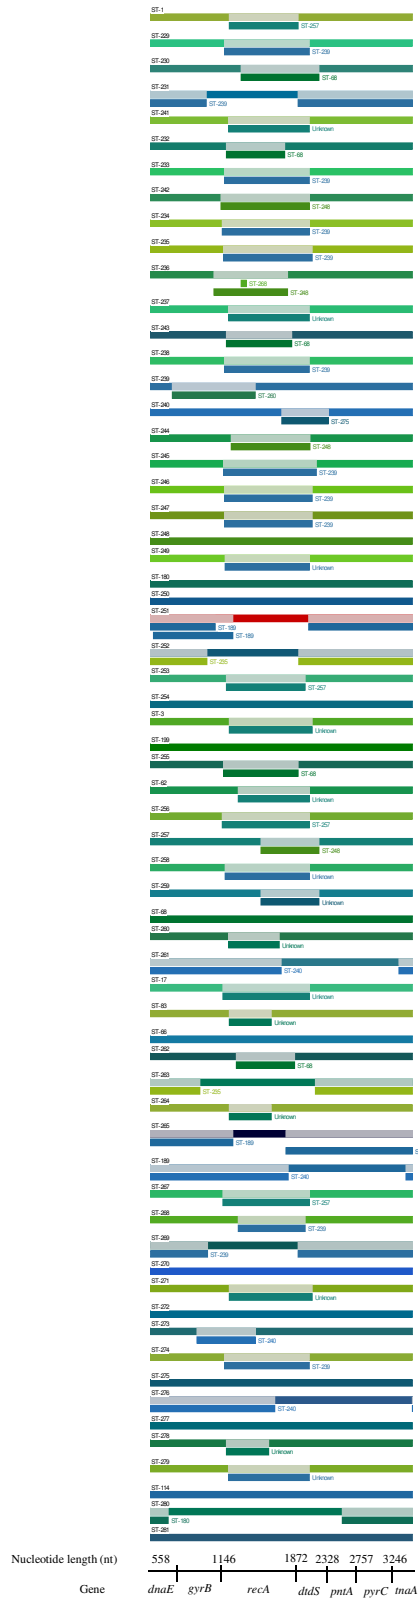

**FIG S6** Recombination events among 63 STs predicted by RDP3 analysis. Thirteen unique recombination events were identified from 175 recombination signals detected among 63 STs of *V. parahaemolyticus*. The figure shows the estimated recombination breakpoints in the nucleotide sequences of 63 STs. Predominant recombination events occurring at the *recA* locus are represented.

**TABLE S1** Nucleotide sequences of PCR and sequencing primers designed for DNA amplification and sequencing of seven housekeeping gene fragments used for MLST of *V. parahaemolyticus*. Primers -F1 and -R1 represent PCR primers; primers -F2 and -R2 represent sequencing primers.

| Gene        | Primer  | PCR/Sequencing | Base position | Sequence (5'-3')        |
|-------------|---------|----------------|---------------|-------------------------|
| <i>dnaE</i> | dnaE-F1 | PCR            | 639-656       | CGA GAT TCG TGT TGC GAT |
|             | dnaE-R1 | PCR            | 1414-1397     | CTA GCG TCA TAC CCG GAT |
|             | dnaE-F2 | Sequencing     | 735-752       | AAT GTG TGA GCT GTT TGC |
|             | dnaE-R2 | Sequencing     | 1329-1312     | ACG GAT TAC CGC TTT CGC |
| <i>gyrB</i> | gyrB-F1 | PCR            | 582-599       | GTT CTT GAA CTC AGG CGT |
|             | gyrB-R1 | PCR            | 1339-1322     | GTG GTA GGA TTG CCT GAT |
|             | gyrB-F2 | Sequencing     | 655-671       | GAA GGT GGT ATT CAA GC  |
|             | gyrB-R2 | Sequencing     | 1281-1264     | GTC ACC CTC CAC AAT GTA |
| <i>recA</i> | recA-F1 | PCR            | 75-92         | CAT GCG CCT TGG TGA TAA |
|             | recA-R1 | PCR            | 1006-989      | CAG GTG CTT CTG GTT GAG |
|             | recA-F2 | Sequencing     | 111-128       | AAC CAT TTC AAC GGG TTC |
|             | recA-R2 | Sequencing     | 877-860       | TGT AGC TGT ACC AAG CAC |
| <i>dtdS</i> | dtdS-F1 | PCR            | 47-64         | GGA TGA CCG AAG TAG ACA |
|             | dtdS-R1 | PCR            | 618-601       | AGC AAG CTC TAG ACG GTA |
|             | dtdS-F2 | Sequencing     | 75-92         | TGG CCA TAA CGA CAT TCT |
|             | dtdS-R2 | Sequencing     | 571-554       | GAG CAC CAA CGT GTT TAG |
| <i>pntA</i> | pntA-F1 | PCR            | 600-617       | TGA CGT TCG TCC AGA AGT |
|             | pntA-R1 | PCR            | 1275-1258     | TAC CGA TGC AAT CCA AGC |
|             | pntA-F2 | Sequencing     | 671-688       | AAG ACT CTG GTT CTG GTG |
|             | pntA-R2 | Sequencing     | 1158-1141     | TTG AGG CTG AGC CGA TAC |
| <i>pyrC</i> | pyrC-F1 | PCR            | 194-211       | GCG AAC AAT TCG AAC CTC |
|             | pyrC-R1 | PCR            | 874-857       | TTG CGA ACG CTT CCA AGT |
|             | pyrC-F2 | Sequencing     | 269-286       | CAA CCG GTA AAA TTG TCG |
|             | pyrC-R2 | Sequencing     | 798-781       | AGT GTA AGA ACC GGC AGA |
| <i>tnaA</i> | tnaA-F1 | PCR            | 548-565       | TCT GTG CCA TCA TCA CGA |
|             | tnaA-R1 | PCR            | 1147-1130     | CCT CCA GAT ACA ACG CAT |
|             | tnaA-F2 | Sequencing     | 591-608       | CCA ACC GGT ATC GAT GGA |
|             | tnaA-R2 | Sequencing     | 1083-1066     | TAT TTT CGC CGC ATC AAC |



**TABLE S2** Nucleotide sequences of additional PCR and sequencing primers designed for amplification and sequencing of seven housekeeping gene fragments of the genes which could not be amplified or sequenced by the primers presented in Table S1.

| <b>Gene</b> | <b>Primer</b> | <b>PCR/Sequencing</b> | <b>Base position</b> | <b>Sequence (5'-3')</b>   |
|-------------|---------------|-----------------------|----------------------|---------------------------|
| <i>dnaE</i> | dnaE-F3       | PCR                   | 677-694              | AAG ATC CAC GCC GAC CAA   |
|             | dnaE-R3       | PCR                   | 1470-1453            | TTC CTC ATC GGC CTC ATA   |
| <i>recA</i> | recA-F3       | PCR                   | 54-71                | GCA ATT CGG TAA AGG CTC   |
|             | recA-F4       | PCR                   | 32-49                | CTG CGC TAG GTC ARA TTG   |
|             | recA-R3       | PCR                   | 925-908              | GCA GGT AGT TAC AAG CGT   |
|             | recA-R4       | PCR                   | 1032-1015            | TTC TTG CTC AGG CTT CTC   |
| <i>dtdS</i> | dtdS-F3       | PCR                   | 23-40                | AGC TAA AGC CTG AAS AAG   |
|             | dtdS-R3       | PCR                   | 645-628              | TAC TGC RCG YGT TAC GCC   |
|             | dtdS-R5       | Sequencing            | 598-580              | CGT TTA CGT CTG TGA TAA C |
| <i>pntA</i> | pntA-F3       | PCR                   | 578-595              | TTG GCG CTA TCG TTC GTG   |
|             | pntA-F4       | PCR                   | 625-642              | CAA GTT GAG TCG ATG GGT   |
|             | pntA-R3       | PCR                   | 1245-1228            | GGC TGC AAC AAG ACC AAT   |
|             | pntA-R4       | PCR                   | 1249-1232            | CAA CGG CTG CAA CAA GAC   |
| <i>pyrC</i> | pyrC-F7       | Sequencing            | 232-249              | GAT AAC ACC ACG CCA GAA   |
| <i>tnaA</i> | tnaA-F3       | PCR                   | 567-584              | AGT GAC GTG TAA CAG CTC   |
|             | tnaA-F3       | Sequencing            | 623-640              | TGT ACG AAA TTG CCA CCA   |
|             | tnaA-R3       | PCR                   | 1128-1111            | ACA CAA GGC TTG TGC TGG   |

**TABLE S3** Amino acid sequence types (aaSTs) correspond to nucleotide sequence types (mlstSTs) of *V. parahaemolyticus* 348 STs from MLST database  
(<http://pubmlst.org/vparahaemolyticus/>)

| aaST | mlstSTs                                                                                                                                                                                               |
|------|-------------------------------------------------------------------------------------------------------------------------------------------------------------------------------------------------------|
| 1    | 19, <b>269</b> , 299                                                                                                                                                                                  |
| 2    | <b>1</b> ,4,5,9,10,13,16, <b>17</b> ,18,22,23,24,25,26,87,98,102,109,110,122,130,132,133,153,157,158,167,170,183,217,219,227,228, <b>234,239,241,243,248,249,254,267,271</b> ,293,300,309,322,330,348 |
| 3    | 191                                                                                                                                                                                                   |
| 4    | 209, <b>277</b> , 321                                                                                                                                                                                 |
| 5    | 82, <b>83,264</b>                                                                                                                                                                                     |
| 6    | 112                                                                                                                                                                                                   |
| 7    | 2, <b>3</b> ,21,27,71,72,159,176,192,196,201,211,220, <b>235</b> ,266,295,305,343                                                                                                                     |
| 8    | <b>66</b>                                                                                                                                                                                             |
| 9    | <b>68</b>                                                                                                                                                                                             |
| 10   | 146, 151, 155, 203, <b>260</b>                                                                                                                                                                        |
| 11   | 63,140,208,323                                                                                                                                                                                        |
| 12   | 6,7                                                                                                                                                                                                   |
| 13   | 14                                                                                                                                                                                                    |
| 14   | <b>256</b>                                                                                                                                                                                            |
| 15   | <b>258</b>                                                                                                                                                                                            |
| 16   | 288                                                                                                                                                                                                   |
| 17   | 12,20,74,76,85,113,116,121,124,166,172,202,210,301,310                                                                                                                                                |
| 18   | 311                                                                                                                                                                                                   |
| 19   | 86                                                                                                                                                                                                    |
| 20   | 64,328,332                                                                                                                                                                                            |
| 21   | 126                                                                                                                                                                                                   |
| 22   | 15, <b>255</b>                                                                                                                                                                                        |
| 23   | 73                                                                                                                                                                                                    |
| 24   | 28,135                                                                                                                                                                                                |
| 25   | 148,152                                                                                                                                                                                               |
| 26   | 342                                                                                                                                                                                                   |
| 27   | 165                                                                                                                                                                                                   |
| 28   | 163                                                                                                                                                                                                   |
| 29   | 317                                                                                                                                                                                                   |
| 30   | 88, <b>189</b> , <b>265</b> , 345                                                                                                                                                                     |
| 31   | 282                                                                                                                                                                                                   |
| 32   | 308                                                                                                                                                                                                   |

TABLE S3 (continued)

| aaST | mlstSTs                                                                                                                                                                                                                                                                                                                                                                             |
|------|-------------------------------------------------------------------------------------------------------------------------------------------------------------------------------------------------------------------------------------------------------------------------------------------------------------------------------------------------------------------------------------|
| 33   | <b>229,233</b>                                                                                                                                                                                                                                                                                                                                                                      |
| 34   | 8,30,31,37,46,47,49,50,53,55,56,57,60, <b>62</b> ,67,70,79,80,84,91,92,97,<br>100,101,104,105,106,115,117,119,120,123,125,131,134,139,141,142,147,156<br>,161,164,171,173,174,178, <b>180</b> ,188,194,195,198,200,207,213,214,215,216,21<br>8,223,224,226, <b>242,244,245,246,247,251,253,259,263,270,273,275,280</b> ,289,2<br>91,304,312,315,316,319,325,326,327,329,335,336,341 |
| 35   | 48, 225, <b>268</b>                                                                                                                                                                                                                                                                                                                                                                 |
| 36   | 75,78,181,284,340                                                                                                                                                                                                                                                                                                                                                                   |
| 37   | 205                                                                                                                                                                                                                                                                                                                                                                                 |
| 38   | <b>232</b>                                                                                                                                                                                                                                                                                                                                                                          |
| 39   | 36,38,39,40,41,42,51,52,59,107,111,129,137,138,187,193, <b>199,237</b>                                                                                                                                                                                                                                                                                                              |
| 40   | 54, <b>230</b>                                                                                                                                                                                                                                                                                                                                                                      |
| 41   | 96,143,185,283,287,200,000                                                                                                                                                                                                                                                                                                                                                          |
| 42   | 169                                                                                                                                                                                                                                                                                                                                                                                 |
| 43   | 128                                                                                                                                                                                                                                                                                                                                                                                 |
| 44   | <b>238</b>                                                                                                                                                                                                                                                                                                                                                                          |
| 45   | 90,108,168,318                                                                                                                                                                                                                                                                                                                                                                      |
| 46   | 11,221                                                                                                                                                                                                                                                                                                                                                                              |
| 47   | <b>257</b>                                                                                                                                                                                                                                                                                                                                                                          |
| 48   | 204                                                                                                                                                                                                                                                                                                                                                                                 |
| 49   | <b>250</b>                                                                                                                                                                                                                                                                                                                                                                          |
| 50   | 285                                                                                                                                                                                                                                                                                                                                                                                 |
| 51   | 297                                                                                                                                                                                                                                                                                                                                                                                 |
| 52   | 29,99,136,145,154,179,190, <b>240,272,276</b> ,337                                                                                                                                                                                                                                                                                                                                  |
| 53   | 94, 162, 197, <b>278</b> , 320                                                                                                                                                                                                                                                                                                                                                      |
| 54   | 286                                                                                                                                                                                                                                                                                                                                                                                 |
| 55   | 32,33,34,77,95,306,307,324,334                                                                                                                                                                                                                                                                                                                                                      |
| 56   | 127, 186, 206, <b>236, 262</b>                                                                                                                                                                                                                                                                                                                                                      |
| 57   | <b>261</b>                                                                                                                                                                                                                                                                                                                                                                          |
| 58   | 89                                                                                                                                                                                                                                                                                                                                                                                  |
| 59   | 150                                                                                                                                                                                                                                                                                                                                                                                 |
| 60   | 43,44,81,314,346                                                                                                                                                                                                                                                                                                                                                                    |
| 61   | 313                                                                                                                                                                                                                                                                                                                                                                                 |
| 62   | 61                                                                                                                                                                                                                                                                                                                                                                                  |
| 63   | 149                                                                                                                                                                                                                                                                                                                                                                                 |
| 64   | 294                                                                                                                                                                                                                                                                                                                                                                                 |
| 65   | 339                                                                                                                                                                                                                                                                                                                                                                                 |

TABLE S3 (continued)

| <b>aaST</b> | <b>mlstSTs</b>         |
|-------------|------------------------|
| 66          | 45                     |
| 67          | 93,144,177,296,333,300 |
| 68          | 69,222                 |
| 69          | 290,298                |
| 70          | 58                     |
| 71          | 184                    |
| 72          | 103                    |
| 73          | 160                    |
| 74          | 182                    |
| 75          | 35                     |
| 76          | <b>252</b>             |
| 77          | 65                     |
| 78          | 118                    |
| 79          | 303                    |
| 80          | <b>114</b>             |
| 81          | 212, <b>274</b>        |
| 82          | 175                    |
| 83          | <b>231</b>             |
| 84          | <b>281</b>             |
| 85          | <b>279</b>             |
| 86          | 331,344                |
| 87          | 338                    |

Numbers in bold represent STs that were found in Thai *V. parahaemolyticus* isolates in the present study.
